# Supplementary material for: Iron capture through CD71 drives perinatal and tumor-associated Treg expansion
Source: JCI Insight. 2024 Jul 2;9(15):e167967. doi: 10.1172/jci.insight.167967 (PMC11383606; doi:10.1172/jci.insight.167967)
Supplement: Supplemental data [file jciinsight-9-167967-s016.pdf]

## SUPPLEMENTARY MATERIAL

**Table S1**

**Characteristics of the HCC patients included in the study**

| Pt | Age (yr) | Sex | Cirrhosis (y/n) | Steatosis (y/n) | HBV (y/n) | HCV (y/n) | AST | ALT | Ferritin (µg/L) | Iron (µg/dL) | Transferrin (mg/dL) |
|----|----------|-----|-----------------|-----------------|-----------|-----------|-----|-----|-----------------|--------------|---------------------|
| 1  | 61       | F   | y               | n               | y         | y         | 72  | 59  | 249             | n/a          | n/a                 |
| 2  | 61       | M   | y               | n               | n         | y         | 44  | 37  | 407             | n/a          | n/a                 |
| 3  | 74       | M   | y               | n               | n         | n         | 52  | 55  | 34              | n/a          | n/a                 |
| 4  | 84       | F   | y               | n               | n         | y         | 50  | 29  | 52              | n/a          | n/a                 |
| 5  | 77       | F   | y               | n               | n         | n         | 34  | 15  | 143             | n/a          | n/a                 |
| 6  | 57       | M   | y               | n               | n         | y         | 84  | 69  | 277             | n/a          | n/a                 |
| 7  | 80       | M   | y               | n               | n         | y         | 86  | 73  | 178             | n/a          | n/a                 |
| 8  | 77       | M   | y               | y               | n         | n         | 31  | 27  | 198,6           | 85           | 182                 |
| 9  | 75       | F   | y               | n               | n         | y         | 52  | 26  | 56              | 15,6         | n/a                 |
| 10 | 72       | M   | y               | n               | n         | y         | 36  | 21  | 274             | 40           | 225                 |
| 11 | 72       | M   | y               | n               | n         | n         | 48  | 35  | 241             | n/a          | n/a                 |
| 12 | 68       | M   | y               | n               | n         | n         | 33  | 27  | 9               | 4,5          | n/a                 |
| 13 | 64       | M   | y               | y               | n         | n         | 44  | 74  | 294             | 116          | 295                 |

Pt: Patient; yr: years; y/n: yes/no; HBV: Hepatitis B virus; HCV: Hepatitis C virus; AST: aspartate aminotransferase; ALT: alanine aminotransferase; n/a: not available.

**Table S2****Baseline clinical characteristics of the neonate and mother populations**

|                                                                |               |
|----------------------------------------------------------------|---------------|
| <b>Neonate, N</b>                                              | 53            |
| Pre-natal characteristics                                      |               |
| <b>GA, weeks</b>                                               | 32.42 ± 2.12  |
| <b>GA ≤ 28, weeks (%)</b>                                      | 1 (1.89)      |
| <b>Twins, N. (%)</b>                                           | 36 (67.92)    |
| <b>Caesarean Section, N. (%)</b>                               | 50 (94.34)    |
| <b>Mother's age &gt; 35 years old, N. (%)</b>                  | 28 (52.83)    |
| <b>Antenatal antibiotics, N/available data (%)</b>             | 12/34 (45.29) |
| <b>Antenatal corticosteroids, N/available data (%)</b>         | 23/34 (67.64) |
| <b>Antenatal iron supplementation, N/available data (%)</b>    | 6/26 (23.07)  |
| <b>Adequate antenatal prophylactic corticosteroids, N. (%)</b> | 36 (67.92)    |
| Post-natal characteristics                                     |               |
| <b>Female sex, N. (%)</b>                                      | 24 (45.28)    |
| <b>BW, N. (%)</b>                                              | 1709 ± 444.84 |
| <b>BW ≤ 1000 grams, N. (%)</b>                                 | 4 (33.3)      |

N: number; GA: gestational age; BW: body weight. Data were expressed as mean ± standard deviation when not specified.

**Table S3****List of all the antibodies used in flow cytometry**

| Marker         | Reactivity  | Localization  | Fluorochrome         | Company           | Clone        |
|----------------|-------------|---------------|----------------------|-------------------|--------------|
| CD127          | Human       | Surface       | PE-Cy7               | BioLegend         | A019D5       |
| CD14           | Human       | Surface       | APC-eFluor 780       | eBioscience       | 61D3         |
| CD16           | Human       | Surface       | APC-eFluor 780       | eBioscience       | eBioCB16     |
| CD19           | Human       | Surface       | APC-eFluor 780       | eBioscience       | HIB19        |
| CD25           | Human       | Surface       | Brilliant Violet 421 | BioLegend         | mA251        |
| CD3            | Human       | Surface       | Alexa Fluor 488      | BioLegend         | OKT3         |
| CD4            | Human       | Surface       | Brilliant Violet 510 | BioLegend         | OKT4         |
| CD45RA         | Human       | Surface       | PE                   | BioLegend         | HI100        |
| CD56           | Human       | Surface       | APC-eFluor 780       | eBioscience       | CMSSB        |
| CD71           | Human       | Surface       | APC                  | eBioscience       | OKT-9        |
| CD8            | Human       | Surface       | APC-Cy7              | BioLegend         | RPA-T8       |
| FOXP3          | Human       | Intracellular | PerCp-Cy5.5          | BioLegend         | PCH101       |
| Ki67           | Human       | Intracellular | Alexa Fluor 700      | BioLegend         | B56          |
| OX40           | Human       | Surface       | Brilliant Violet 605 | BioLegend         | ACT35        |
| OX40           | Human       | Surface       | PE                   | BioLegend         | ACT35        |
| c-Maf          | Mouse       | Intracellular | PE-Cy7               | eBioscience       | sym0F1       |
| CCR8           | Mouse       | Surface       | APC                  | BioLegend         | SA214G2      |
| CD3            | Mouse       | Surface       | BB700                | BD Biosciences    | 145-2C11     |
| CD3            | Mouse       | Surface       | PE-Cy7               | BioLegend         | 17A2         |
| CD4            | Mouse       | Surface       | Brilliant Violet 605 | BioLegend         | RM4-5        |
| CD4            | Mouse       | Surface       | PerCP-Cy5.5          | eBioscience       | RM4-5        |
| CD4            | Mouse       | Surface       | Brilliant Violet 786 | BD Biosciences    | RM4-5        |
| CD44           | Mouse       | Surface       | PE-Cy7               | BioLegend         | IM7          |
| CD44           | Mouse       | Surface       | Brilliant Violet 510 | BD Biosciences    | IM7          |
| CD62L          | Mouse       | Surface       | Pe/Dazzle 594        | BioLegend         | MEL-14       |
| CD71           | Mouse       | Surface       | Brilliant Violet 421 | BD Biosciences    | C2           |
| CD8            | Mouse       | Surface       | Brilliant Violet 785 | BioLegend         | 53-6.7       |
| DEC1           | Mouse       | Intracellular | Alexa Fluor 647      | Novus Biologicals | Polyclonal   |
| Foxp3          | Mouse       | Intracellular | APC                  | eBioscience       | FJK-16s      |
| Foxp3          | Mouse       | Intracellular | PE-eFluor 610        | eBioscience       | FJK-16s      |
| Helios         | Mouse/Human | Intracellular | APC                  | eBioscience       | 22F6         |
| IFN- $\gamma$  | Mouse       | Intracellular | Brilliant Violet 421 | BioLegend         | XMG1.2       |
| IL-13          | Mouse       | Intracellular | PE                   | eBioscience       | eBio13A      |
| IL-17          | Mouse       | Intracellular | PerCP-Cy5.5          | BioLegend         | TC11-18H10.1 |
| IL-4           | Mouse       | Intracellular | Brilliant Violet 605 | BD Biosciences    | 11B11        |
| IL-5           | Mouse       | Intracellular | APC                  | BioLegend         | TRFK5        |
| KLRG1          | Mouse       | Surface       | Pe/Dazzle 594        | BioLegend         | 2F1/KLRG1    |
| NFIL3          | Mouse       | Intracellular | PE                   | eBioscience       | S2M-E19      |
| PD1            | Mouse       | Surface       | PerCP-eFluor710      | eBioscience       | RMP1-30      |
| Phospho-S6     | Mouse       | Intracellular | APC                  | Cell Signaling    | D57.2.2E     |
| ROR $\gamma$ t | Mouse       | Intracellular | PerCP-eFluor 710     | Invitrogen        | B2D          |
| ST2            | Mouse       | Surface       | Brilliant Violet 421 | BD Biosciences    | U29-93       |
| TCR- $\beta$   | Mouse       | Surface       | Brilliant Violet 510 | BD Biosciences    | H57-597      |
| TCR- $\beta$   | Mouse       | Surface       | Brilliant Violet 711 | BioLegend         | H57-597      |

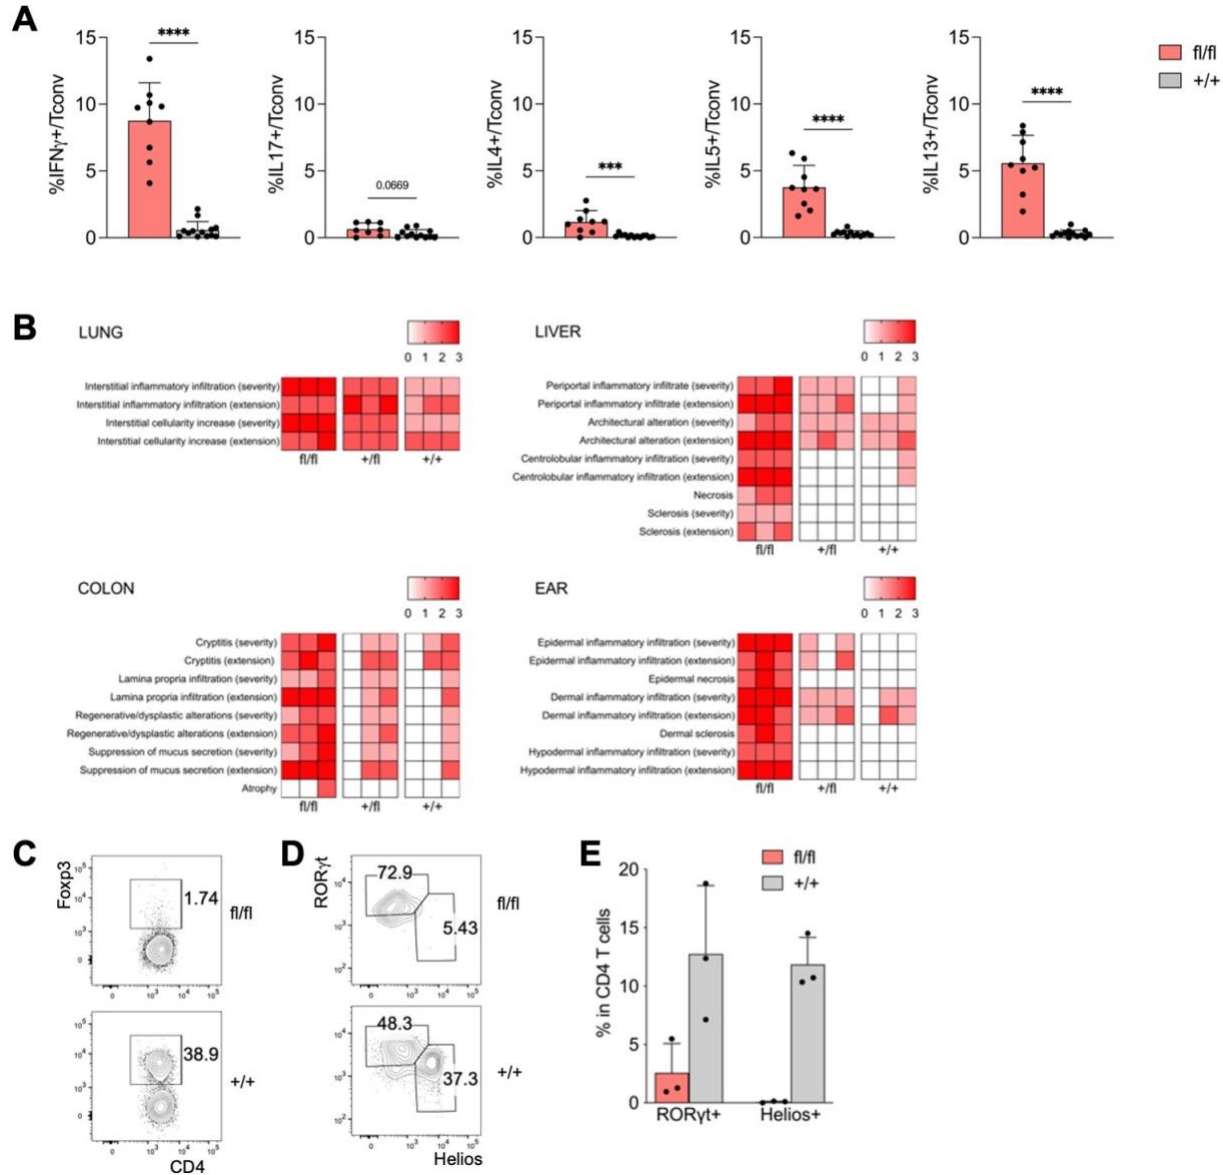

**Figure S1. T helper response, histopathological scores and intestinal Tregs in mice with Treg-specific CD71-deficiency**

(A) Frequency of cytokine-producing cells in gated Tconvs from the spleens of *Foxp3<sup>Cre/Y</sup> Tfr<sup>fl/fl</sup>* mice (fl/fl, n=8-9), compared to *Foxp3<sup>Cre/Y</sup> Tfr<sup>+/+</sup>* (+/+, n=12-13) littermates, at 8-10 days of age. \*\*\*  $P < 0.001$ , \*\*\*\*  $P < 0.0001$ , by Mann-Whitney test. (B) Heatmap showing the scores from 0 to 3 assigned to the indicated histopathological features in lung, liver, colon, and ear of *Foxp3<sup>Cre/Y</sup> Tfr<sup>fl/fl</sup>* male mice (fl/fl), compared to *Foxp3<sup>Cre/Y</sup> Tfr<sup>+/fl</sup>* (+/fl) and *Foxp3<sup>Cre/Y</sup> Tfr<sup>+/+</sup>* (+/+) male littermates (3 mice/group), at 3 weeks of age. All the ordinal variables were scored as severity (0, normal; 1, slight; 2, moderate; 3, marked) and extension (0, absent; 1, focal; 2, multifocal; 3, diffuse). (C-E) Representative plots of Treg frequency (C) and of ROR $\gamma$ t versus Helios expression in gated Tregs (D), and cumulative analysis of the percentages of the two Treg subsets in gated CD4 T cells (E), in the colonic LP of *Foxp3<sup>Cre/Y</sup> Tfr<sup>fl/fl</sup>* compared to *Tfr<sup>+/+</sup>* males (3 mice/group), at 3 weeks of age. Bars indicate means  $\pm$  SD.

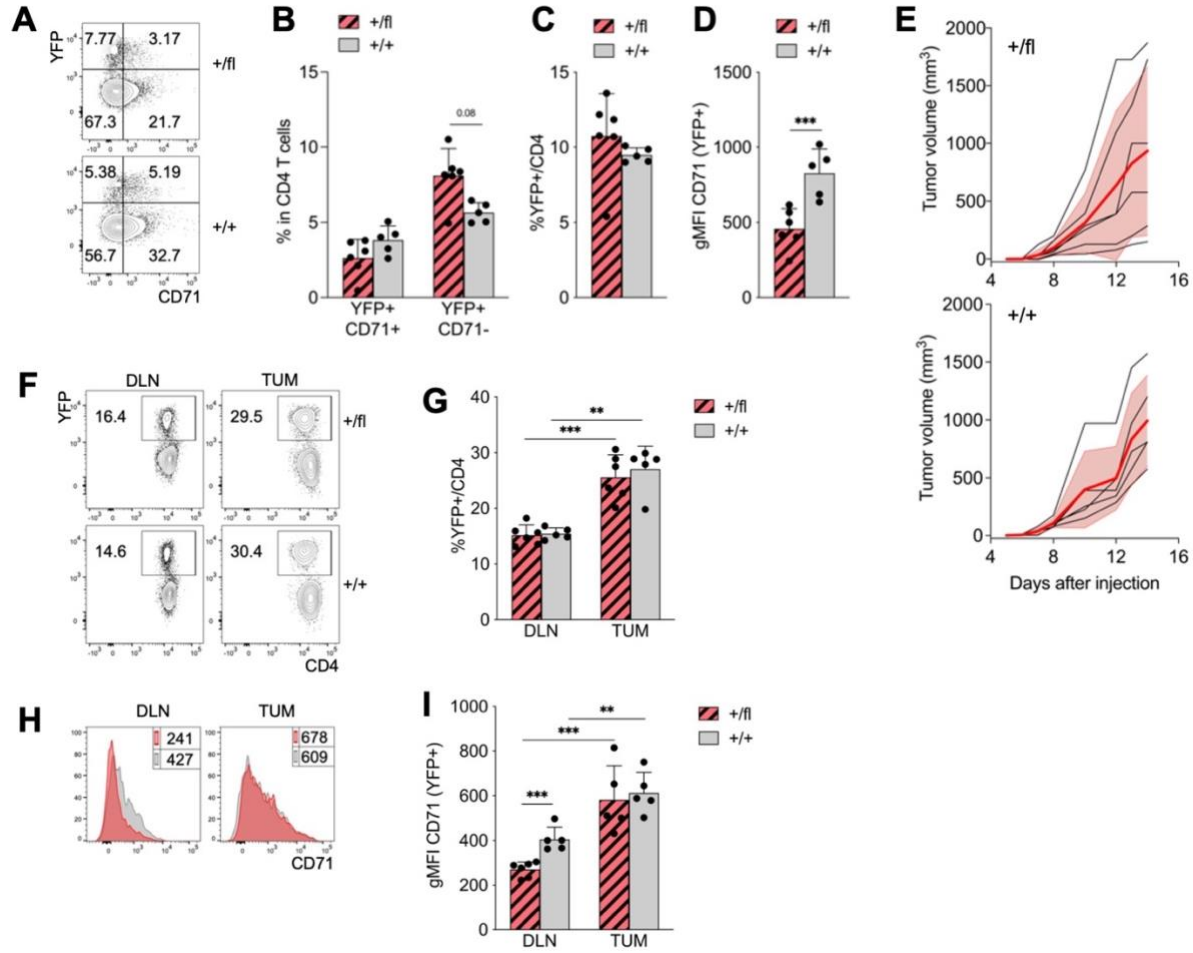

**Figure S2. CD71 haploinsufficiency in Tregs is compensated at the tumor site**

(A-D) Representative contour plots (A) and cumulative analysis showing the percentages of CD71<sup>+</sup> and CD71<sup>-</sup> YFP<sup>+</sup> cells (B), the percentages of YFP<sup>+</sup> cells (C), and the expression of CD71 in gated YFP<sup>+</sup> cells (D), in the spleens of *Foxp3*<sup>Cre/Y</sup> *Tfr*<sup>+/fl</sup> male mice (+/fl), compared to *Foxp3*<sup>Cre/Y</sup> *Tfr*<sup>+/+</sup> (+/+) male littermates (n=5-6 mice/group). Bars indicate means  $\pm$  SD. \*\*\*  $P < 0.005$ , by Mann-Whitney test. (E) Growth curves of the 18.5 HCC cell line, subcutaneously injected in *Foxp3*<sup>Cre/Y</sup> *Tfr*<sup>+/fl</sup> or *Tfr*<sup>+/+</sup> male males (n=5-6 mice/group). The red line and red areas represent mean and SD, respectively. (F-G) Representative plots (F) and cumulative data (G) of YFP<sup>+</sup> cell frequency in draining lymph nodes (DLN) and tumors (TUM) of tumor-bearing *Foxp3*<sup>Cre/Y</sup> *Tfr*<sup>+/fl</sup> or *Tfr*<sup>+/+</sup> male mice. (H-I) Representative plots (H) and cumulative data (I) of CD71 expression in YFP<sup>+</sup> cells in draining lymph nodes (DLN) and tumors (TUM) of tumor-bearing *Foxp3*<sup>Cre/Y</sup> *Tfr*<sup>+/fl</sup> or *Tfr*<sup>+/+</sup> male mice. Numbers indicate the geometric mean fluorescence intensity (gMFI). Bars indicate means  $\pm$  SD. \*\*  $P < 0.01$ , \*\*\*  $P < 0.005$ , by Mann-Whitney test.

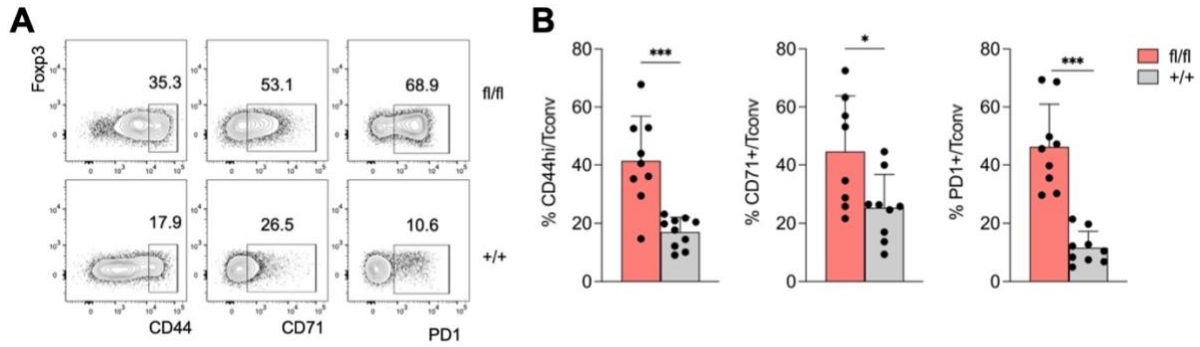

**Figure S3. Tconvs are activated in neonates with Treg-specific CD71 depletion**

(A) Representative plots and (B) cumulative data of the expression of CD44, CD71 and PD1 in gated CD4<sup>+</sup> Foxp3<sup>-</sup> (Tconvs) from the livers of *Foxp3*<sup>Cre/Y</sup> *Tfr*<sup>fl/fl</sup> male mice (fl/fl, red), compared to *Foxp3*<sup>Cre/Y</sup> *Tfr*<sup>+/+</sup> male littermates (+/+, black), aged 8-10 days. Data are from 9-10 samples per group, pooled from 2 independent experiments. Bars indicate means  $\pm$  SD. \*  $P < 0.05$ , \*\*\*  $P < 0.005$ , by Mann-Whitney test.

## IL-2

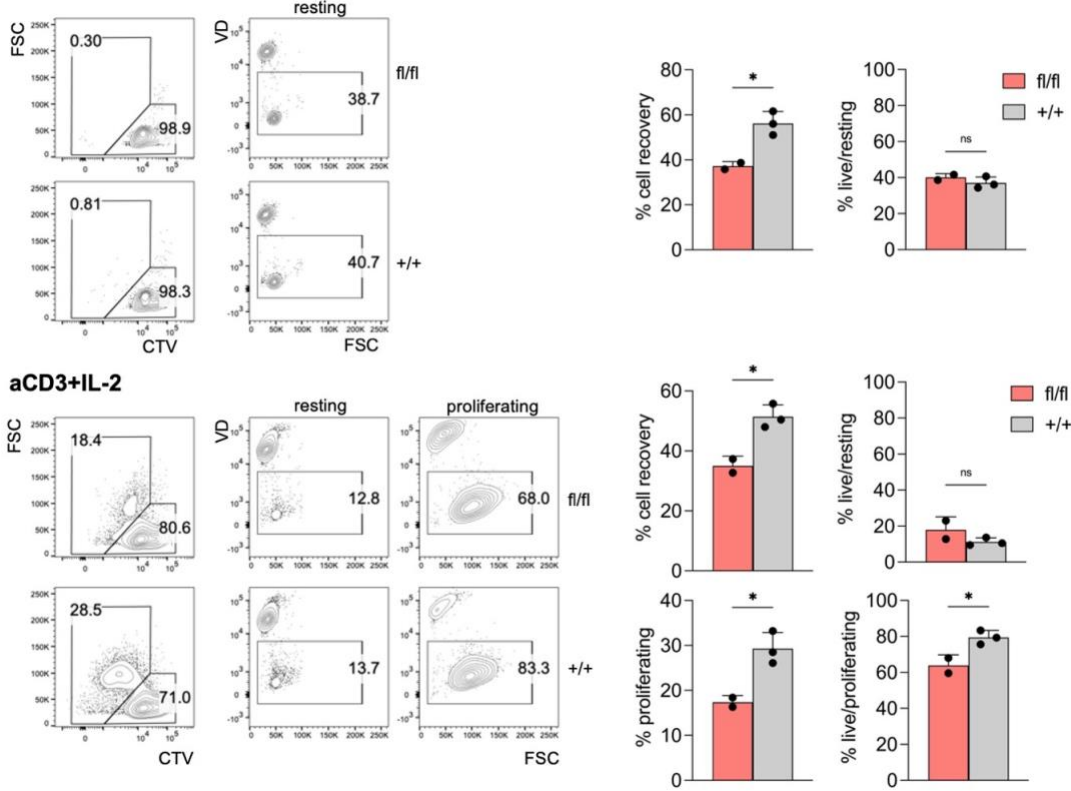

**Figure S4. Reduced proliferation and survival in vitro of CD71-deficient Tregs**

CD4<sup>+</sup> YFP<sup>+</sup> cells were sorted from spleens of *Foxp3*<sup>Cre/+</sup> *Tfrc*<sup>fl/fl</sup> female mice (fl/fl) or *Foxp3*<sup>Cre/+</sup> *Tfrc*<sup>+/+</sup> female littermates (+/+) of 8-12 weeks of age, labelled with Cell Trace Violet (CTV), and cultured in vitro for 3 days with IL-2 alone or with coated anti-CD3 and IL-2. Then, the percentage of cell recovery was calculated by dividing the number of recovered cells over the number of seeded cells. Cells were analyzed by flow cytometry, using a gating strategy where dead cell were not excluded. Data are from one experiment representative of two. Each condition was tested in 2-3 replicates. \*  $P < 0.05$ , by unpaired Student t test.

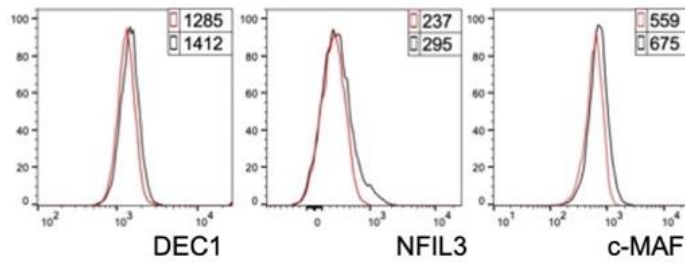

**Figure S5. Expression of tissue-Treg markers in CD71-deficient Tregs**

Representative histogram overlays showing the intracellular expression of DEC1, NFIL3, and c-MAF, in CD4<sup>+</sup> YFP<sup>+</sup> cells sorted from spleens of *Fxp3<sup>Cre/+</sup> Tfrc<sup>fl/fl</sup>* female mice (fl/fl, red lines), compared to *Fxp3<sup>Cre/+</sup> Tfrc<sup>+/+</sup>* female littermates (+/+), aged 8-12 weeks. Numbers indicate the geometric mean fluorescence intensity (gMFI).

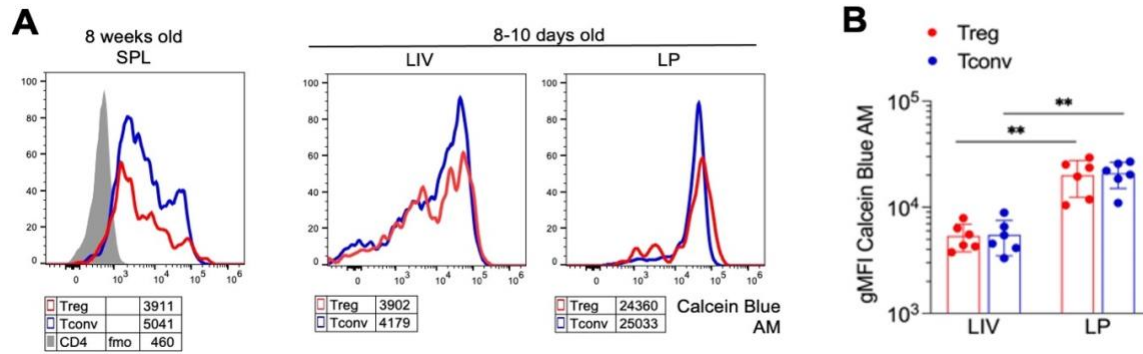

**Figure S6. Labile iron pool in Tregs and Tconvs from healthy *Foxp3*<sup>Cre</sup> mice**

(A) Representative histogram overlays of Calcein Blue AM staining in gated CD4<sup>+</sup>YFP<sup>+</sup> (Treg) and YFP<sup>+</sup> (Tconv) from the indicated organs and ages. Numbers indicate the gMFI. (B) Cumulative analysis of the gMFI of Calcein Blue AM staining in gated Tregs (red) and Tconvs (blue) in the livers (LIV) or colonic lamina propria (LP) of 8-10 days-old *Foxp3*<sup>Cre</sup> healthy mice (n=6). \*\*  $P < 0.01$ , by Mann-Whitney test.

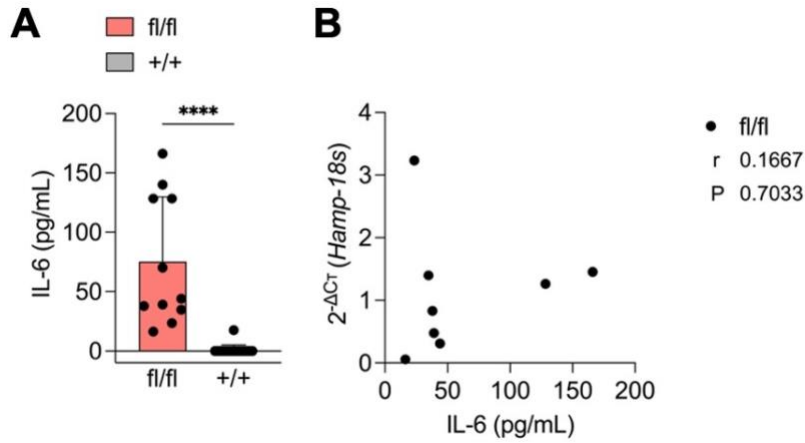

**Figure S7. Determination of IL-6 in serum of neonates with Treg-specific CD71 depletion**

(A) Cumulative analysis of the concentration of IL-6 determined by ELISA in the serum of *Foxp3<sup>Cre/Y</sup> Tfr<sup>fl/fl</sup>* male mice (fl/fl, n=11), compared to *Foxp3<sup>Cre/Y</sup> Tfr<sup>+/+</sup>* male littermates (+/+, n=18), aged 8-10 days. Bars indicate means  $\pm$  SD. \*\*\*\*  $P < 0.0001$ , by Mann-Whitney test. (B) Spearman correlation between serum IL-6 concentrations and hepatic the *Hamp* gene expression in matched samples from *Foxp3<sup>Cre/Y</sup> Tfr<sup>fl/fl</sup>* mice (n=8).
